# Supplementary material
Source: PubMed Central journal article supplement (PMC3529085)
Supplement: 1210236109_pnas.201210236SI.pdf [file 1210236109_pnas.201210236SI.pdf]

# Supporting Information

Dupire et al. 10.1073/pnas.1210236109

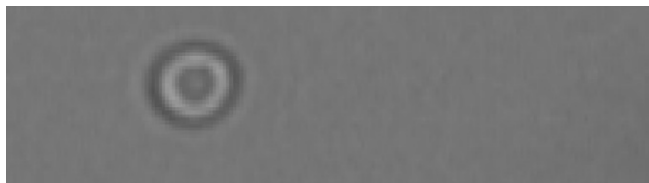

**Movie S1.** Evolution of the orientation of a red blood cell (RBC) with an increasing shear rate. In the movie, “s-1” stands for the shear rate dimension,  $[s^{-1}]$ . For each movie part, shear rate is equal, respectively, to  $2 s^{-1}$ ,  $4 s^{-1}$ ,  $6 s^{-1}$ ,  $8 s^{-1}$ ,  $10 s^{-1}$ , and  $12 s^{-1}$ . The movie corresponds to the sequences in Fig. 1B.

[Movie S1](#)

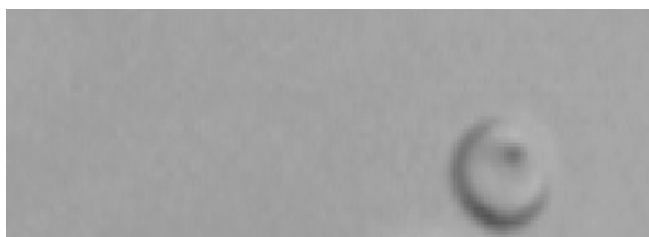

**Movie S2.** Tank-treading RBC with the rotation of a bead stuck to the membrane. Images in differential interference microscopy. In the movie, “s-1” stands for the shear rate dimension,  $[s^{-1}]$ . Shear rate is equal to  $3 s^{-1}$ . The movie corresponds to the sequences in Fig. 3A.

[Movie S2](#)

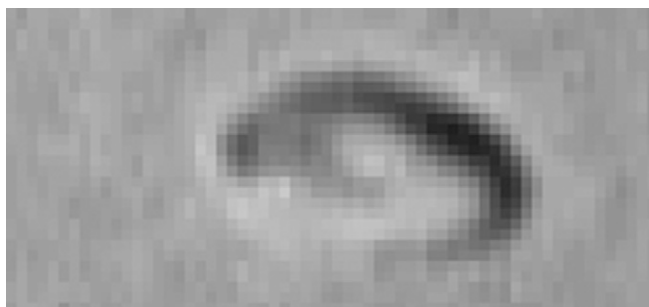

**Movie S3.** Rolling-to-tank-treading transition. Images are in phase contrast. In the movie, “s-1” stands for the shear rate dimension,  $[s^{-1}]$ . Shear rate is equal to  $3 s^{-1}$ . The movie corresponds to the sequences in Fig. 4A.

[Movie S3](#)
